# Supplementary material
Source: publisher site journal article supplement (https://www.dovepress.com/article/245192)
Supplement: Supplementary file 1 [file get_supplementary_file.php]

## Search Protocol

### Search 29.10.18 and 30.10.18

#### All articles, of the past 10 years:

##### Pubmed:

1. "Myopia" "Progression" "Prevention" "Outdoor" → 20 articles
2. "Myopia" "Progression" "Prevention" "Outside" → 7 articles
3. "Myopia" "Prevention" "Outside" → 10
4. "Myopia" "Prevention" "Outdoor" → 41
5. "Myopia" "Progression" "Prevention" "UV-light" → 1
6. "Myopia" "Progression" "Prevention" "Sunlight" → 6
7. "Myopia" "Outdoor" → 134
8. "Myopia" "Outdoor" "Activity" → 79

→ Total: 141 articles

##### Cochrane:

1. "Myopia" "Progression" "Prevention" "Outdoor" → 3 articles
2. "Myopia" "Progression" "Prevention" "Outside" → 1 article
3. "Myopia" "Prevention" "Outside" → 1
4. "Myopia" "Prevention" "Outdoor" → 7
5. "Myopia" "Progression" "Prevention" "UV-light" → 0
6. "Myopia" "Progression" "Prevention" "Sunlight" → 2
7. "Myopia" "Outdoor" → 25
8. "Myopia" "Outdoor" "Activity" → 17

→ Total: 26 articles (without duplicates)

### **Total 167**

→ **Total of 158 articles:** without further duplicates (9 articles found with Cochrane search which already found through Pubmed search)

### Search up-date 4.1.2019

##### Pubmed (all articles, past 10 years):

1. "Myopia" "Progression" "Prevention" "Outdoor" → + 2 articles
2. "Myopia" "Progression" "Prevention" "Outside" → 0
3. "Myopia" "Prevention" "Outside" → 0
4. "Myopia" "Prevention" "Outdoor" → +3 articles
5. "Myopia" "Progression" "Prevention" "UV-light" → 0
6. "Myopia" "Progression" "Prevention" "Sunlight" → 0
7. "Myopia" "Outdoor" → + 8
8. "Myopia" "Outdoor" "Activity" → + 2

#### **Total of +8 articles**

→ all not meeting inclusion criteria → no inclusion

##### Cochrane:

1. "Myopia" "Progression" "Prevention" "Outdoor" → 0
2. "Myopia" "Progression" "Prevention" "Outside" → 0
3. "Myopia" "Prevention" "Outside" → 0
4. "Myopia" "Prevention" "Outdoor" → 0

5. "Myopia" "Progression" "Prevention" "UV-light" → 0
6. "Myopia" "Progression" "Prevention" "Sunlight" → 0
7. "Myopia" "Outdoor" → 0
8. "Myopia" "Outdoor" "Activity" → 0

**No new articles**
